# Supplementary material for: Nanochain-structured mesoporous tungsten carbide and its superior electrocatalysis
Source: Royal Society of Chemistry journal article supplement (doi:10.1039/b902744k), 2009-01-01
Supplement: b902744k.pdf [file b902744k.pdf]

## Supplementary Information

### **Nanochain-structured mesoporous tungsten carbides and its superior electrocatalysis**

Yi Wang,<sup>a</sup> Shuqin Song,<sup>a</sup> Pei Kang Shen,<sup>\*a</sup> Chunxian Guo<sup>b</sup> and Chang Ming Li<sup>\*b</sup>

<sup>a</sup>State Key Laboratory of Optoelectronic Materials and Technologies, School of Physics and Engineering, Sun Yat-Sen University, Guangzhou, 510275 China. E-mail: stsspk@mail.sysu.edu.cn (P. K. Shen); Tel.: +86 20 84036736; Fax: +86 20 84113369.

<sup>b</sup>School of Chemical and Biomedical Engineering, Nanyang Technological University, Singapore, 637457 Singapore. E-mail: ecml@ntu.edu.sg (C.M. Li); Tel.: +65 67904485; Fax: +65 67911761.

As we discussed in the paper that the molar ratio of AMT/glucose and the reaction time obviously affect the formation of tungsten carbides during the hydrothermal and thermal treatment process. In the case of 0.039 molar ratio of AMT/glucose and 900°C, tungsten is mainly presented as WO<sub>2</sub>, W and a small quantity of W<sub>2</sub>C reacted for 60 min, while WC and a very small amount of W<sub>2</sub>C dominate the product when the reaction time is over 180 min with the WC nanocrystallite size of 13 nm. However, the WO<sub>2</sub> and WO<sub>3</sub> were observed by X-ray photoelectron spectroscopic measurement even at the optimized conditions as shown in Fig. S1. It is believed that the thin WO<sub>x</sub> film at nanometer level formed in air, which is hardly detectable by XRD.

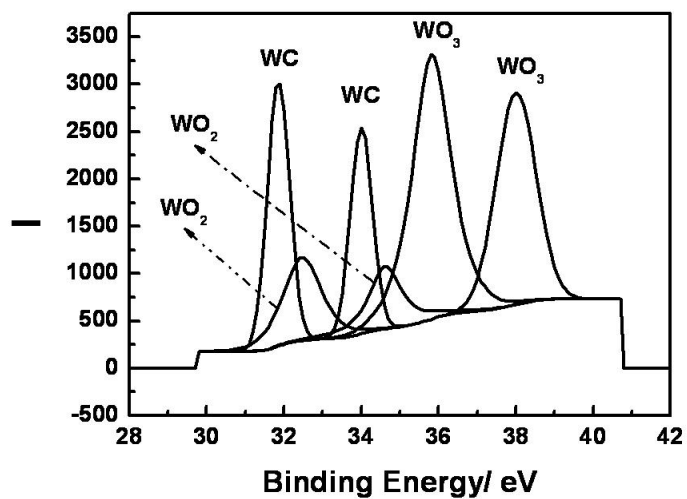

**Fig. S1** The X-ray photoelectron spectroscopic result of the as-prepared sample.

The proposed mechanism of the formation of *m*-NCTC is schematically shown in Figure S2.

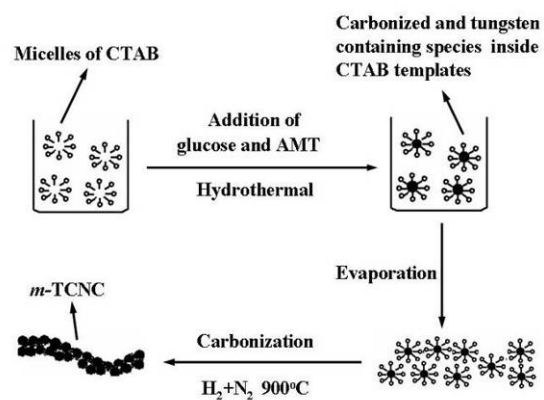

**Fig. S2** Schematic diagram for the formation of *m*-NCTC.

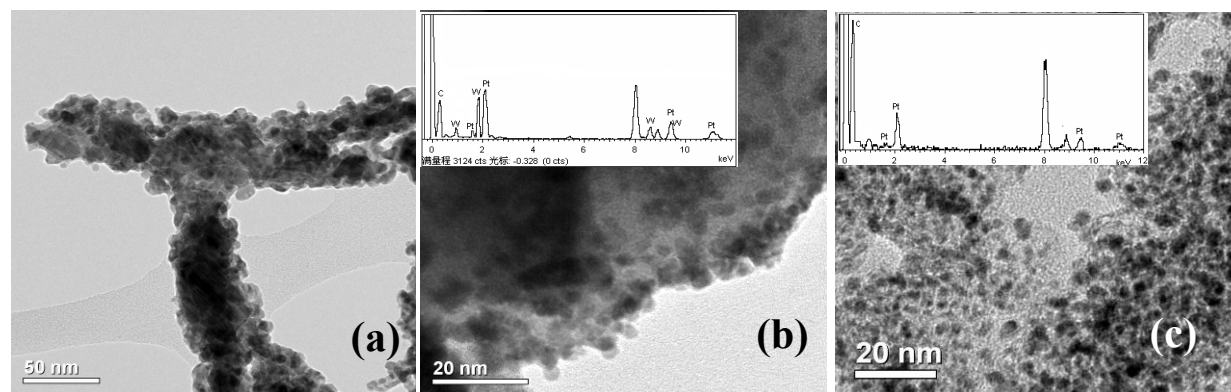

**Fig. S3.** The TEM images of Pt/*m*-NCTC (a, b) and Pt/C (c). The inset images in Figure S3 (b) and (c) are the EDS patterns of Pt/*m*-NCTC and Pt/C, respectively.

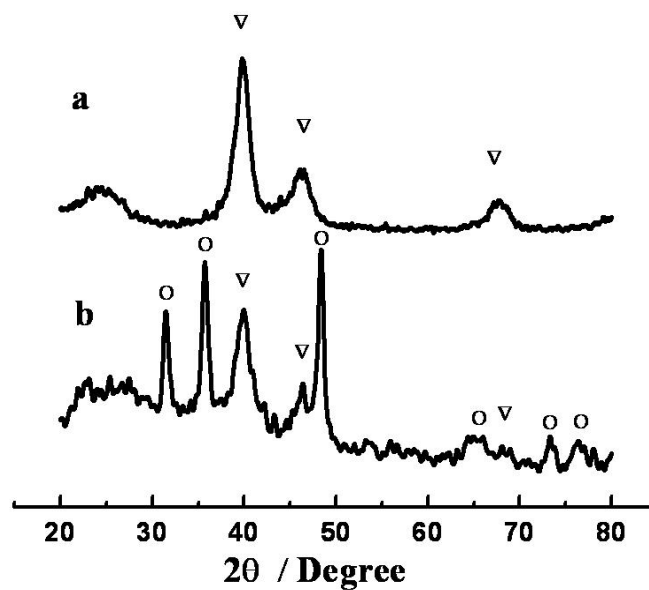

**Fig. S4** XRD patterns of as-prepared (a) Pt/C and (b) Pt/*m*-NCTC catalysts (o--WC,  $\nabla$ --Pt).

**Table S1 Electrocatalytic performance of various catalysts for methanol oxidation**

| Catalysts          | ESA<br>(m <sup>2</sup> /g) | Mass activity<br>(A/g Pt) | Onset potential (V) | Backward peak<br>potential (V) |
|--------------------|----------------------------|---------------------------|---------------------|--------------------------------|
| Pt/C               | 37.2                       | 196                       | 0.38                | 0.42                           |
| Pt/ <i>m</i> -NCTC | 48.1                       | 323                       | 0.26                | 0.48                           |

**References:**

S1 P. K. Shen and Z. Q. Tian, *Electrochim. Acta*, 2004, **49**, 3107.

S2 S. Song, Y. Wang and P. K. Shen, *J. Power Sources*, 2007, **17**, 46.
